# Supplementary material
Source: Springer Nature journal article supplement (https://www.springermedizin.de/resource/supplementary/12876_2014_1183_MOESM5_ESM.pdf/9438288)
Supplement: MOESM5 [file 9438288]

|                             | 7Fr catheter                                                                                                         | 5Fr catheter                                                                                                   |
|-----------------------------|----------------------------------------------------------------------------------------------------------------------|----------------------------------------------------------------------------------------------------------------|
| Relief of jaundice          | Faster                                                                                                               | Slower                                                                                                         |
| Discomfort                  | Stronger                                                                                                             | Weaker                                                                                                         |
| Recommend situation for use | <ul style="list-style-type: none"><li>• Scheduled for surgery or chemotherapy</li><li>• Severe cholangitis</li></ul> | <ul style="list-style-type: none"><li>• Regular use</li><li>• Need to monitor tube kinking carefully</li></ul> |
